# Supplementary material for: Bacterial Profiles of Brain in Downer Cattle with Unknown Etiology
Source: MDPI journal article supplement (doi:10.3390/microorganisms11010098), 2022-12-30
Supplement: s1 [file s1]

**Table S6:**

**Differences of COG categories from downer and normal cattle.** The bold character in COG category means that it showed statistically significant.

| COG category                                                    | Downer cattle               |                        | Normal cattle               |                        | No. of functional genes | <i>p</i> -values (corrected) |
|-----------------------------------------------------------------|-----------------------------|------------------------|-----------------------------|------------------------|-------------------------|------------------------------|
|                                                                 | Mean relative frequency (%) | Standard deviation (%) | Mean relative frequency (%) | Standard deviation (%) |                         |                              |
| A. RNA processing and modification                              | 0.02                        | 0.01                   | 0.02                        | 0.01                   | 1                       | 0.67071                      |
| B. Chromatin structure and dynamics                             | 0.02                        | 0.01                   | 0.02                        | 0.01                   | 0                       | 0.36330                      |
| C. Energy production and conversion                             | 6.04                        | 0.45                   | 5.91                        | 0.44                   | 135                     | 0.16685                      |
| D. Cell cycle control, cell division, chromosome partitioning   | 1.34                        | 0.14                   | 1.39                        | 0.15                   | 33                      | 0.09869                      |
| E. Amino acid transport and metabolism                          | 9.30                        | 0.65                   | 9.41                        | 0.56                   | 163                     | 0.38351                      |
| <b>F. Nucleotide transport and metabolism</b>                   | <b>3.53</b>                 | <b>0.43</b>            | <b>3.89</b>                 | <b>0.32</b>            | <b>75</b>               | <b>0.00001</b>               |
| <b>G. Carbohydrate transport and metabolism</b>                 | <b>6.62</b>                 | <b>1.02</b>            | <b>7.15</b>                 | <b>1.08</b>            | <b>126</b>              | <b>0.01660</b>               |
| <b>H. Coenzyme transport and metabolism</b>                     | <b>5.86</b>                 | <b>0.48</b>            | <b>6.33</b>                 | <b>0.52</b>            | <b>116</b>              | <b>0.00002</b>               |
| <b>I. Lipid transport and metabolism</b>                        | <b>4.27</b>                 | <b>0.43</b>            | <b>3.94</b>                 | <b>0.34</b>            | <b>70</b>               | <b>0.00005</b>               |
| <b>J. Translation, ribosomal structure and biogenesis</b>       | <b>9.37</b>                 | <b>1.59</b>            | <b>10.16</b>                | <b>1.20</b>            | <b>164</b>              | <b>0.00631</b>               |
| K. Transcription                                                | 6.52                        | 0.62                   | 6.51                        | 0.53                   | 90                      | 0.92842                      |
| <b>L. Replication, recombination and repair</b>                 | <b>4.54</b>                 | <b>0.60</b>            | <b>4.77</b>                 | <b>0.37</b>            | <b>91</b>               | <b>0.02058</b>               |
| M. Cell wall/membrane/envelope biogenesis                       | 6.29                        | 0.78                   | 6.52                        | 1.08                   | 112                     | 0.24342                      |
| <b>N. Cell motility</b>                                         | <b>1.39</b>                 | <b>0.55</b>            | <b>1.02</b>                 | <b>0.39</b>            | <b>45</b>               | <b>0.00020</b>               |
| O. Posttranslational modification, protein turnover, chaperones | 4.20                        | 0.32                   | 4.29                        | 0.31                   | 89                      | 0.17398                      |
| P. Inorganic ion transport and metabolism                       | 5.84                        | 0.40                   | 5.81                        | 0.66                   | 140                     | 0.76377                      |

**Table S6.** (Continued)

| COG category                                                            | Downer cattle               |                        | Normal cattle               |                        | No. of functional genes | <i>p</i> -values (corrected) |
|-------------------------------------------------------------------------|-----------------------------|------------------------|-----------------------------|------------------------|-------------------------|------------------------------|
|                                                                         | Mean relative frequency (%) | Standard deviation (%) | Mean relative frequency (%) | Standard deviation (%) |                         |                              |
| <b>Q. Secondary metabolites biosynthesis, transport and catabolism</b>  | <b>1.88</b>                 | <b>0.46</b>            | <b>1.59</b>                 | <b>0.27</b>            | <b>64</b>               | <b>0.00013</b>               |
| <b>R. General function prediction only</b>                              | <b>8.48</b>                 | <b>0.56</b>            | <b>8.12</b>                 | <b>0.54</b>            | <b>232</b>              | <b>0.00194</b>               |
| <b>S. Function unknown</b>                                              | <b>4.98</b>                 | <b>0.78</b>            | <b>4.59</b>                 | <b>0.95</b>            | <b>431</b>              | <b>0.03139</b>               |
| <b>T. Signal transduction mechanisms</b>                                | <b>4.14</b>                 | <b>0.46</b>            | <b>3.93</b>                 | <b>0.37</b>            | <b>105</b>              | <b>0.01393</b>               |
| <b>U. Intracellular trafficking, secretion, and vesicular transport</b> | <b>1.46</b>                 | <b>0.33</b>            | <b>1.24</b>                 | <b>0.18</b>            | <b>62</b>               | <b>0.00006</b>               |
| V. Defense mechanisms                                                   | 2.65                        | 0.38                   | 2.53                        | 0.32                   | 11                      | 0.11145                      |
| <b>W. Extracellular structures</b>                                      | <b>0.41</b>                 | <b>0.18</b>            | <b>0.28</b>                 | <b>0.12</b>            | <b>20</b>               | <b>0.00006</b>               |
| <b>X. Mobilome: prophages, transposons</b>                              | <b>0.83</b>                 | <b>0.29</b>            | <b>0.56</b>                 | <b>0.35</b>            | <b>72</b>               | <b>0.00010</b>               |
| <b>Z. Cytoskeleton</b>                                                  | <b>0.01</b>                 | <b>0.01</b>            | <b>0.01</b>                 | <b>0.01</b>            | <b>1</b>                | <b>0.04584</b>               |
