# Supplementary material for: Bacterial Profiles of Brain in Downer Cattle with Unknown Etiology
Source: MDPI journal article supplement (doi:10.3390/microorganisms11010098), 2022-12-30
Supplement: s1 [file s1]

**Table S2:**  
**Diagnosis results of downer and normal cattle.**

| Sample          | Age (month) | Sex    | Pathological diagnosis                | Clinical symptom                                                | Calcium conc. (mg/dL)               | Magnesium conc. (mg/dL)            | Pathogenic bacteria isolation           | Virus detection | Antibody test | Post mortal change | Final diagnosis |
|-----------------|-------------|--------|---------------------------------------|-----------------------------------------------------------------|-------------------------------------|------------------------------------|-----------------------------------------|-----------------|---------------|--------------------|-----------------|
| 19B01.Brain     | 18          | Male   | Not detected                          | Lack of appetite, Intertia, High fever                          |                                     |                                    | No isolate                              | Not detected    | Not detected  | Not detected       | Downer cattle   |
| 19B02.Forebrain | 36          | Female | Not detected                          | Not detected                                                    |                                     |                                    | No isolate                              | Not detected    | Not detected  | Not detected       | Downer cattle   |
| 19B02.Midbrain  | 36          | Female | Not detected                          | Not detected                                                    |                                     |                                    | No isolate                              | Not detected    | Not detected  | Not detected       | Downer cattle   |
| 19B03.Brain     | 48          | Female | Not detected                          | Sudden death                                                    |                                     |                                    | No isolate                              | Not detected    | Not detected  | Not detected       | Downer cattle   |
| 19B12.Brain     | 49          | Female | Not detected                          | Anxiety, Excitation, Ataxia, Unknown nonambulatory state        | within normal range (8.5-12.4mg/dL) | within normal range (1.8-3.2mg/dL) | <i>Carnobacterium divergens</i> (brain) | Not detected    | Not detected  | Not detected       | Downer cattle   |
| 19B13.Brain     | 36          | Female | Mild non-suppurative encephalitis     | Anxiety, Ataxia, Unknown nonambulatory state                    |                                     |                                    | No isolate                              | Not detected    | Not detected  | Not detected       | Downer cattle   |
| 19B14.Brain     | 50          | Female | Not detected                          | Depress, Ataxia, Unknown nonambulatory state                    |                                     |                                    | No isolate                              | Not detected    | Not detected  | Not detected       | Downer cattle   |
| 19B15.Brain     | 16          | Male   | Moderate non-suppurative encephalitis | Depress, Ataxia, Unknown nonambulatory state, Unknown paralysis |                                     |                                    | <i>Carnobacterium divergens</i> (brain) | Not detected    | Not detected  | Not detected       | Downer cattle   |
| 19B22.Brain     | 26          | Female | Mild non-suppurative encephalitis     | Depress, Ataxia, Unknown nonambulatory state, Unknown paralysis |                                     |                                    | No isolate                              | Not detected    | Not detected  | Not detected       | Downer cattle   |
| 19B23.Brain     | 26          | Female | Mild non-suppurative encephalitis     | Depress, Ataxia, Unknown nonambulatory state, Unknown paralysis |                                     |                                    | No isolate                              | Not detected    | Not detected  | Not detected       | Downer cattle   |

Table S2. (Continued)

| Sample           | Age (month) | Sex    | Pathological diagnosis                            | Clinical symptom                                                | Calcium conc. (mg/dL)               | Magnesium conc. (mg/dL)            | Pathogenic bacteria isolation           | Virus detection | Antibody test | Post mortal change | Final diagnosis |
|------------------|-------------|--------|---------------------------------------------------|-----------------------------------------------------------------|-------------------------------------|------------------------------------|-----------------------------------------|-----------------|---------------|--------------------|-----------------|
| 19B28.Brain      | 62          | Female | Not detected                                      | Depress, Ataxia, Unknown nonambulatory state, Unknown paralysis | within normal range (8.5-12.4mg/dL) | within normal range (1.8-3.2mg/dL) | <i>Carnobacterium divergens</i> (brain) | Not detected    | Not detected  | Not detected       | Downer cattle   |
| 19B29.Brain      | 75          | Female | Not detected                                      | Depress, Ataxia, Unknown nonambulatory state, Unknown paralysis |                                     |                                    | No isolate                              | Not detected    | Not detected  | Not detected       | Downer cattle   |
| 19B33.Brainstem  | 27          | Female | Mild lymphoblastic inflammation on the brain      | Depress, Anxiety, Ataxia, Unknown nonambulatory state           |                                     |                                    | No isolate                              | Not detected    | Not detected  | Not detected       | Downer cattle   |
| 19B33.Cerebellum | 27          | Female | Mild lymphoblastic inflammation on the brain      | Depress, Anxiety, Ataxia, Unknown nonambulatory state           |                                     |                                    | No isolate                              | Not detected    | Not detected  | Not detected       | Downer cattle   |
| 19B33.Forebrain  | 27          | Female | Mild lymphoblastic inflammation on the brain      | Depress, Anxiety, Ataxia, Unknown nonambulatory state           |                                     |                                    | No isolate                              | Not detected    | Not detected  | Not detected       | Downer cattle   |
| 19B33.Hindbrain  | 27          | Female | Mild lymphoblastic inflammation on the brain      | Depress, Anxiety, Ataxia, Unknown nonambulatory state           |                                     |                                    | No isolate                              | Not detected    | Not detected  | Not detected       | Downer cattle   |
| 19B33.Midbrain   | 27          | Female | Mild lymphoblastic inflammation on the brain      | Depress, Anxiety, Ataxia, Unknown nonambulatory state           |                                     |                                    | No isolate                              | Not detected    | Not detected  | Not detected       | Downer cattle   |
| 19B34.Brainstem  | 108         | Female | Lymphocytic infiltration of cerebral blood vessel | Unknown nonambulatory state                                     |                                     |                                    | No isolate                              | BVDV            | Not detected  | Not detected       | Downer cattle   |
| 19B34.Cerebellum | 108         | Female | Lymphocytic infiltration of cerebral blood vessel | Unknown nonambulatory state                                     |                                     |                                    | No isolate                              | BVDV            | Not detected  | Not detected       | Downer cattle   |
| 19B34.Forebrain  | 108         | Female | Lymphocytic infiltration of cerebral blood vessel | Unknown nonambulatory state                                     |                                     |                                    | No isolate                              | BVDV            | Not detected  | Not detected       | Downer cattle   |

**Table S2.** (Continued)

| Sample           | Age (month) | Sex    | Pathological diagnosis                            | Clinical symptom                                                         | Calcium conc. (mg/dL)     | Magnesium conc. (mg/dL)   | Pathogenic bacteria isolation     | Virus detection | Antibody test | Post mortal change | Final diagnosis |
|------------------|-------------|--------|---------------------------------------------------|--------------------------------------------------------------------------|---------------------------|---------------------------|-----------------------------------|-----------------|---------------|--------------------|-----------------|
| 19B34.Hindbrain  | 108         | Female | Lymphocytic infiltration of cerebral blood vessel | Unknown nonambulatory state                                              |                           |                           | No isolate                        | BVDV            | Not detected  | Not detected       | Downer cattle   |
| 19B34.Midbrain   | 108         | Female | Lymphocytic infiltration of cerebral blood vessel | Unknown nonambulatory state                                              |                           |                           | No isolate                        | BVDV            | Not detected  | Not detected       | Downer cattle   |
| 19B35.Brainstem  | 74          | Female | Severe suppurative encephalitis                   | Depress, Ataxia, Unknown nonambulatory state                             |                           |                           | <i>Trueperella pyogenes</i> (all) | Not detected    | Not detected  | Not detected       | Downer cattle   |
| 19B35.Cerebellum | 74          | Female | Severe suppurative encephalitis                   | Depress, Ataxia, Unknown nonambulatory state                             |                           |                           | <i>Trueperella pyogenes</i> (all) | Not detected    | Not detected  | Not detected       | Downer cattle   |
| 19B35.Forebrain  | 74          | Female | Severe suppurative encephalitis                   | Depress, Ataxia, Unknown nonambulatory state                             | within normal range (8.5- | within normal range (1.8- | <i>Trueperella pyogenes</i> (all) | Not detected    | Not detected  | Not detected       | Downer cattle   |
| 19B35.Hindbrain  | 74          | Female | Severe suppurative encephalitis                   | Depress, Ataxia, Unknown nonambulatory state                             | 12.4mg/dL)                | 3.2mg/dL)                 | <i>Trueperella pyogenes</i> (all) | Not detected    | Not detected  | Not detected       | Downer cattle   |
| 19B35.Midbrain   | 74          | Female | Severe suppurative encephalitis                   | Depress, Ataxia, Unknown nonambulatory state                             |                           |                           | <i>Trueperella pyogenes</i> (all) | Not detected    | Not detected  | Not detected       | Downer cattle   |
| 19B36.Brainstem  | 38          | Female | Non-suppurative encephalitis                      | Depress, Anxiety, Ataxia, Unknown nonambulatory state, Unknown paralysis |                           |                           | No isolate                        | Not detected    | Not detected  | Not detected       | Downer cattle   |
| 19B36.Cerebellum | 38          | Female | Non-suppurative encephalitis                      | Depress, Anxiety, Ataxia, Unknown nonambulatory state, Unknown paralysis |                           |                           | No isolate                        | Not detected    | Not detected  | Not detected       | Downer cattle   |
| 19B36.Forebrain  | 38          | Female | Non-suppurative encephalitis                      | Depress, Anxiety, Ataxia, Unknown nonambulatory state, Unknown paralysis |                           |                           | No isolate                        | Not detected    | Not detected  | Not detected       | Downer cattle   |

**Table S2.** (Continued)

| Sample           | Age (month) | Sex    | Pathological diagnosis       | Clinical symptom                                                         | Calcium conc. (mg/dL)               | Magnesium conc. (mg/dL)            | Pathogenic bacteria isolation | Virus detection | Antibody test | Post mortal change | Final diagnosis |
|------------------|-------------|--------|------------------------------|--------------------------------------------------------------------------|-------------------------------------|------------------------------------|-------------------------------|-----------------|---------------|--------------------|-----------------|
| 19B36.Hindbrain  | 38          | Female | Non-suppurative encephalitis | Depress, Anxiety, Ataxia, Unknown nonambulatory state, Unknown paralysis |                                     |                                    | No isolate                    | Not detected    | Not detected  | Not detected       | Downer cattle   |
| 19B36.Midbrain   | 38          | Female | Non-suppurative encephalitis | Depress, Anxiety, Ataxia, Unknown nonambulatory state, Unknown paralysis |                                     |                                    | No isolate                    | Not detected    | Not detected  | Not detected       | Downer cattle   |
| 19B37.Forebrain  | 24          | Male   | Suppurative tonsillitis      | Depress, Ataxia, Unknown nonambulatory state, Unknown paralysis          |                                     |                                    | No isolate                    | Not detected    | Not detected  | Not detected       | Downer cattle   |
| 19B37.Hindbrain  | 24          | Male   | Suppurative tonsillitis      | Depress, Ataxia, Unknown nonambulatory state, Unknown paralysis          |                                     |                                    | No isolate                    | Not detected    | Not detected  | Not detected       | Downer cattle   |
| 19B37.Midbrain   | 24          | Male   | Suppurative tonsillitis      | Depress, Ataxia, Unknown nonambulatory state, Unknown paralysis          | within normal range (8.5-12.4mg/dL) | within normal range (1.8-3.2mg/dL) | No isolate                    | Not detected    | Not detected  | Not detected       | Downer cattle   |
| 19B38.Cerebellum | 32          | Female | Not detected                 | Depress, Anxiety, Ataxia, Unknown nonambulatory state, Unknown paralysis |                                     |                                    | No isolate                    | Not detected    | Not detected  | Not detected       | Downer cattle   |
| 19B38.Forebrain  | 32          | Female | Not detected                 | Depress, Anxiety, Ataxia, Unknown nonambulatory state, Unknown paralysis |                                     |                                    | No isolate                    | Not detected    | Not detected  | Not detected       | Downer cattle   |
| 19B38.Hindbrain  | 32          | Female | Not detected                 | Depress, Anxiety, Ataxia, Unknown nonambulatory state, Unknown paralysis |                                     |                                    | No isolate                    | Not detected    | Not detected  | Not detected       | Downer cattle   |
| 19B38.Midbrain   | 32          | Female | Not detected                 | Depress, Anxiety, Ataxia, Unknown nonambulatory state, Unknown paralysis |                                     |                                    | No isolate                    | Not detected    | Not detected  | Not detected       | Downer cattle   |
| 19B39.Brainstem  | 49          | Female | Not detected                 | Depress, Ataxia, Unknown nonambulatory state, Unknown paralysis          |                                     |                                    | No isolate                    | Not detected    | Not detected  | Not detected       | Downer cattle   |

Table S2. (Continued)

| Sample           | Age (month) | Sex    | Pathological diagnosis | Clinical symptom                                                | Calcium conc. (mg/dL)               | Magnesium conc. (mg/dL)            | Pathogenic bacteria isolation                                                               | Virus detection | Antibody test | Post mortal change | Final diagnosis |
|------------------|-------------|--------|------------------------|-----------------------------------------------------------------|-------------------------------------|------------------------------------|---------------------------------------------------------------------------------------------|-----------------|---------------|--------------------|-----------------|
| 19B39.Cerebellum | 49          | Female | Not detected           | Depress, Ataxia, Unknown nonambulatory state, Unknown paralysis | within normal range (8.5-12.4mg/dL) | within normal range (1.8-3.2mg/dL) | No isolate                                                                                  | Not detected    | Not detected  | Not detected       | Downer cattle   |
| 19B39.Forebrain  | 49          | Female | Not detected           | Depress, Ataxia, Unknown nonambulatory state, Unknown paralysis |                                     |                                    | <i>Carnobacterium maltaromaticum</i> (Forebrain)                                            | Not detected    | Not detected  | Not detected       | Downer cattle   |
| 19B39.Hindbrain  | 49          | Female | Not detected           | Depress, Ataxia, Unknown nonambulatory state, Unknown paralysis |                                     |                                    | No isolate                                                                                  | Not detected    | Not detected  | Not detected       | Downer cattle   |
| 19B39.Midbrain   | 49          | Female | Not detected           | Depress, Ataxia, Unknown nonambulatory state, Unknown paralysis |                                     |                                    | <i>Carnobacterium maltaromaticum</i> (Midbrain)                                             | Not detected    | Not detected  | Not detected       | Downer cattle   |
| 19B40.Brainstem  | 72          | Female | Not detected           | Ataxia, Unknown nonambulatory state, Unknown paralysis          |                                     |                                    | No isolate                                                                                  | Not detected    | Not detected  | Not detected       | Downer cattle   |
| 19B40.Cerebellum | 72          | Female | Not detected           | Ataxia, Unknown nonambulatory state, Unknown paralysis          |                                     |                                    | No isolate                                                                                  | Not detected    | Not detected  | Not detected       | Downer cattle   |
| 19B40.Forebrain  | 72          | Female | Not detected           | Ataxia, Unknown nonambulatory state, Unknown paralysis          |                                     |                                    | No isolate                                                                                  | Not detected    | Not detected  | Not detected       | Downer cattle   |
| 19B40.Hindbrain  | 72          | Female | Not detected           | Ataxia, Unknown nonambulatory state, Unknown paralysis          |                                     |                                    | No isolate                                                                                  | Not detected    | Not detected  | Not detected       | Downer cattle   |
| 19B40.Midbrain   | 72          | Female | Not detected           | Ataxia, Unknown nonambulatory state, Unknown paralysis          |                                     |                                    | No isolate                                                                                  | Not detected    | Not detected  | Not detected       | Downer cattle   |
| 19B41.Cerebellum | 63          | Male   | Not detected           | Unknown nonambulatory state, Pytalism, Neurological sign        |                                     |                                    | <i>Carnobacterium maltaromaticum</i> , <i>Enterococcus faecalis</i> (Cerebellum, Hindbrain) | Not detected    | Not detected  | Not detected       | Downer cattle   |

Table S2. (Continued)

| Sample            | Age (month) | Sex    | Pathological diagnosis | Clinical symptom                                         | Calcium conc. (mg/dL)               | Magnesium conc. (mg/dL)            | Pathogenic bacteria isolation                                                               | Virus detection | Antibody test | Post mortem change | Final diagnosis |
|-------------------|-------------|--------|------------------------|----------------------------------------------------------|-------------------------------------|------------------------------------|---------------------------------------------------------------------------------------------|-----------------|---------------|--------------------|-----------------|
| 19B41.Forebrain   | 63          | Male   | Not detected           | Unknown nonambulatory state, Pytalism, Neurological sign | within normal range (8.5-12.4mg/dL) | within normal range (1.8-3.2mg/dL) | <i>Carnobacterium divergens</i> , <i>Enterococcus faecalis</i> (Forebrain, Midbrain)        | Not detected    | Not detected  | Not detected       | Downer cattle   |
| 19B41.Hindbrain   | 63          | Male   | Not detected           | Unknown nonambulatory state, Pytalism, Neurological sign |                                     |                                    | <i>Carnobacterium maltaromaticum</i> , <i>Enterococcus faecalis</i> (Cerebellum, Hindbrain) | Not detected    | Not detected  | Not detected       | Downer cattle   |
| 19B41.Midbrain    | 63          | Male   | Not detected           | Unknown nonambulatory state, Pytalism, Neurological sign |                                     |                                    | <i>Carnobacterium divergens</i> , <i>Enterococcus faecalis</i> (Forebrain, Midbrain)        | Not detected    | Not detected  | Not detected       | Downer cattle   |
| 19B42.Cerebellum  | 57          | Female | Not detected           | Unknown nonambulatory state, Pytalism                    |                                     |                                    | No isolate                                                                                  | Not detected    | Not detected  | Not detected       | Downer cattle   |
| 19B42.Forebrain   | 57          | Female | Not detected           | Unknown nonambulatory state, Pytalism                    |                                     |                                    | <i>Carnobacterium maltaromaticum</i> , <i>Enterococcus faecalis</i> (Forebrain)             | Not detected    | Not detected  | Not detected       | Downer cattle   |
| 19B42.Hindbrain   | 57          | Female | Not detected           | Unknown nonambulatory state, Pytalism                    |                                     |                                    | No isolate                                                                                  | Not detected    | Not detected  | Not detected       | Downer cattle   |
| 19B42.Midbrain    | 57          | Female | Not detected           | Unknown nonambulatory state, Pytalism                    |                                     |                                    | <i>Carnobacterium divergens</i> , <i>Enterococcus faecalis</i> (Midbrain)                   | Not detected    | Not detected  | Not detected       | Downer cattle   |
| 19R149.Brainstem  | 30          | Male   | Not detected           | Not detected                                             |                                     |                                    | No isolate                                                                                  | Not detected    | Not detected  | Not detected       | Normal cattle   |
| 19R149.Cerebellum | 30          | Male   | Not detected           | Not detected                                             |                                     |                                    | No isolate                                                                                  | Not detected    | Not detected  | Not detected       | Normal cattle   |

**Table S2.** (Continued)

| Sample             | Age (month) | Sex  | Pathological diagnosis | Clinical symptom | Calcium conc. (mg/dL)               | Magnesium conc. (mg/dL)            | Pathogenic bacteria isolation | Virus detection | Antibody test | Post mortal change | Final diagnosis |
|--------------------|-------------|------|------------------------|------------------|-------------------------------------|------------------------------------|-------------------------------|-----------------|---------------|--------------------|-----------------|
| 19R149.Forebrain   | 30          | Male | Not detected           | Not detected     | within normal range (8.5-12.4mg/dL) | within normal range (1.8-3.2mg/dL) | No isolate                    | Not detected    | Not detected  | Not detected       | Normal cattle   |
| 19R149.Hindbrain   | 30          | Male | Not detected           | Not detected     |                                     |                                    | No isolate                    | Not detected    | Not detected  | Not detected       | Normal cattle   |
| 19R149.Midbrain    | 30          | Male | Not detected           | Not detected     |                                     |                                    | No isolate                    | Not detected    | Not detected  | Not detected       | Normal cattle   |
| 19R150.Brainstem   | 29          | Male | Not detected           | Not detected     |                                     |                                    | No isolate                    | Not detected    | Not detected  | Not detected       | Normal cattle   |
| 19R150.Cerebellum  | 29          | Male | Not detected           | Not detected     |                                     |                                    | No isolate                    | Not detected    | Not detected  | Not detected       | Normal cattle   |
| 19R150.Forebrain   | 29          | Male | Not detected           | Not detected     |                                     |                                    | No isolate                    | Not detected    | Not detected  | Not detected       | Normal cattle   |
| 19R150.Hindbrain   | 29          | Male | Not detected           | Not detected     |                                     |                                    | No isolate                    | Not detected    | Not detected  | Not detected       | Normal cattle   |
| 19R150.Midbrain    | 29          | Male | Not detected           | Not detected     |                                     |                                    | No isolate                    | Not detected    | Not detected  | Not detected       | Normal cattle   |
| 19R1601.Brainstem  | 31          | Male | Not detected           | Not detected     |                                     |                                    | No isolate                    | Not detected    | Not detected  | Not detected       | Normal cattle   |
| 19R1601.Cerebellum | 31          | Male | Not detected           | Not detected     |                                     |                                    | No isolate                    | Not detected    | Not detected  | Not detected       | Normal cattle   |
| 19R1601.Forebrain  | 31          | Male | Not detected           | Not detected     |                                     |                                    | No isolate                    | Not detected    | Not detected  | Not detected       | Normal cattle   |
| 19R1601.Hindbrain  | 31          | Male | Not detected           | Not detected     |                                     |                                    | No isolate                    | Not detected    | Not detected  | Not detected       | Normal cattle   |
| 19R1601.Midbrain   | 31          | Male | Not detected           | Not detected     |                                     |                                    | No isolate                    | Not detected    | Not detected  | Not detected       | Normal cattle   |
| 19R1603.Brainstem  | 30          | Male | Not detected           | Not detected     |                                     |                                    | No isolate                    | Not detected    | Not detected  | Not detected       | Normal cattle   |
| 19R1603.Cerebellum | 30          | Male | Not detected           | Not detected     |                                     |                                    | No isolate                    | Not detected    | Not detected  | Not detected       | Normal cattle   |
| 19R1603.Forebrain  | 30          | Male | Not detected           | Not detected     |                                     |                                    | No isolate                    | Not detected    | Not detected  | Not detected       | Normal cattle   |

**Table S2.** (Continued)

| Sample             | Age<br>(month) | Sex  | Pathological<br>diagnosis | Clinical symptom | Calcium<br>conc.<br>(mg/dL)                      | Magnesium<br>conc.<br>(mg/dL)                   | Pathogenic<br>bacteria<br>isolation | Virus<br>detection | Antibody<br>test | Post<br>mortal<br>change | Final<br>diagnosis |
|--------------------|----------------|------|---------------------------|------------------|--------------------------------------------------|-------------------------------------------------|-------------------------------------|--------------------|------------------|--------------------------|--------------------|
| 19R1603.Hindbrain  | 30             | Male | Not detected              | Not detected     | within<br>normal<br>range<br>(8.5-<br>12.4mg/dL) | within<br>normal<br>range<br>(1.8-<br>3.2mg/dL) | No isolate                          | Not<br>detected    | Not<br>detected  | Not<br>detected          | Normal<br>cattle   |
| 19R1603.Midbrain   | 30             | Male | Not detected              | Not detected     |                                                  |                                                 | No isolate                          | Not<br>detected    | Not<br>detected  | Not<br>detected          | Normal<br>cattle   |
| 19R1604.Brainstem  | 29             | Male | Not detected              | Not detected     |                                                  |                                                 | No isolate                          | Not<br>detected    | Not<br>detected  | Not<br>detected          | Normal<br>cattle   |
| 19R1604.Cerebellum | 29             | Male | Not detected              | Not detected     |                                                  |                                                 | No isolate                          | Not<br>detected    | Not<br>detected  | Not<br>detected          | Normal<br>cattle   |
| 19R1604.Forebrain  | 29             | Male | Not detected              | Not detected     |                                                  |                                                 | No isolate                          | Not<br>detected    | Not<br>detected  | Not<br>detected          | Normal<br>cattle   |
| 19R1604.Hindbrain  | 29             | Male | Not detected              | Not detected     |                                                  |                                                 | No isolate                          | Not<br>detected    | Not<br>detected  | Not<br>detected          | Normal<br>cattle   |
| 19R1604.Midbrain   | 29             | Male | Not detected              | Not detected     |                                                  |                                                 | No isolate                          | Not<br>detected    | Not<br>detected  | Not<br>detected          | Normal<br>cattle   |
| 19R1651.Brainstem  | 29             | Male | Not detected              | Not detected     |                                                  |                                                 | No isolate                          | Not<br>detected    | Not<br>detected  | Not<br>detected          | Normal<br>cattle   |
| 19R1651.Cerebellum | 29             | Male | Not detected              | Not detected     |                                                  |                                                 | No isolate                          | Not<br>detected    | Not<br>detected  | Not<br>detected          | Normal<br>cattle   |
| 19R1651.Forebrain  | 29             | Male | Not detected              | Not detected     |                                                  |                                                 | No isolate                          | Not<br>detected    | Not<br>detected  | Not<br>detected          | Normal<br>cattle   |
| 19R1651.Hindbrain  | 29             | Male | Not detected              | Not detected     |                                                  |                                                 | No isolate                          | Not<br>detected    | Not<br>detected  | Not<br>detected          | Normal<br>cattle   |
| 19R1651.Midbrain   | 29             | Male | Not detected              | Not detected     |                                                  |                                                 | No isolate                          | Not<br>detected    | Not<br>detected  | Not<br>detected          | Normal<br>cattle   |
| 19R1652.Brainstem  | 28             | Male | Not detected              | Not detected     |                                                  |                                                 | No isolate                          | Not<br>detected    | Not<br>detected  | Not<br>detected          | Normal<br>cattle   |
| 19R1652.Cerebellum | 28             | Male | Not detected              | Not detected     |                                                  |                                                 | No isolate                          | Not<br>detected    | Not<br>detected  | Not<br>detected          | Normal<br>cattle   |
| 19R1652.Forebrain  | 28             | Male | Not detected              | Not detected     |                                                  |                                                 | No isolate                          | Not<br>detected    | Not<br>detected  | Not<br>detected          | Normal<br>cattle   |
| 19R1652.Hindbrain  | 28             | Male | Not detected              | Not detected     |                                                  |                                                 | No isolate                          | Not<br>detected    | Not<br>detected  | Not<br>detected          | Normal<br>cattle   |



**Table S2.** (Continued)

| Sample             | Age<br>(month) | Sex  | Pathological<br>diagnosis | Clinical symptom | Calcium<br>conc.<br>(mg/dL)                      | Magnesium<br>conc.<br>(mg/dL)                   | Pathogenic<br>bacteria<br>isolation | Virus<br>detection | Antibody<br>test | Post<br>mortal<br>change | Final<br>diagnosis |
|--------------------|----------------|------|---------------------------|------------------|--------------------------------------------------|-------------------------------------------------|-------------------------------------|--------------------|------------------|--------------------------|--------------------|
| 19R1652.Midbrain   | 28             | Male | Not detected              | Not detected     | within<br>normal<br>range<br>(8.5-<br>12.4mg/dL) | within<br>normal<br>range<br>(1.8-<br>3.2mg/dL) | No isolate                          | Not<br>detected    | Not<br>detected  | Not<br>detected          | Normal<br>cattle   |
| 19R1653.Brainstem  | 28             | Male | Not detected              | Not detected     |                                                  |                                                 | No isolate                          | Not<br>detected    | Not<br>detected  | Not<br>detected          | Normal<br>cattle   |
| 19R1653.Cerebellum | 28             | Male | Not detected              | Not detected     |                                                  |                                                 | No isolate                          | Not<br>detected    | Not<br>detected  | Not<br>detected          | Normal<br>cattle   |
| 19R1653.Midbrain   | 28             | Male | Not detected              | Not detected     |                                                  |                                                 | No isolate                          | Not<br>detected    | Not<br>detected  | Not<br>detected          | Normal<br>cattle   |
| 19R1656.Cerebellum | 27             | Male | Not detected              | Not detected     |                                                  |                                                 | No isolate                          | Not<br>detected    | Not<br>detected  | Not<br>detected          | Normal<br>cattle   |
| 19R1656.Forebrain  | 27             | Male | Not detected              | Not detected     |                                                  |                                                 | No isolate                          | Not<br>detected    | Not<br>detected  | Not<br>detected          | Normal<br>cattle   |
| 19R1656.Hindbrain  | 27             | Male | Not detected              | Not detected     |                                                  |                                                 | No isolate                          | Not<br>detected    | Not<br>detected  | Not<br>detected          | Normal<br>cattle   |
| 19R1656.Midbrain   | 27             | Male | Not detected              | Not detected     |                                                  |                                                 | No isolate                          | Not<br>detected    | Not<br>detected  | Not<br>detected          | Normal<br>cattle   |
