# Supplementary material for: Bacterial Profiles of Brain in Downer Cattle with Unknown Etiology
Source: MDPI journal article supplement (doi:10.3390/microorganisms11010098), 2022-12-30
Supplement: s1 [file s1]

**Table S1:**

**The list of bovine brain tissues based on the disease diagnostics in this study.** In table O and X means the presence and absence of each brain tissue, respectively. Mixed brain sample indicates that all brain tissues were mixed.

| Disease<br>diagnostics | Sample<br>name | Brain tissue (n = 57) |          |           |            |            |
|------------------------|----------------|-----------------------|----------|-----------|------------|------------|
|                        |                | Forebrain             | Midbrain | Hindbrain | Cerebellum | Brain stem |
| Downer<br>cattle       | 19B38          | O                     | O        | O         | O          | X          |
|                        | 19B39          | O                     | O        | O         | O          | O          |
|                        | 19B40          | O                     | O        | O         | O          | O          |
|                        | 19B41          | O                     | O        | O         | O          | X          |
|                        | 19B42          | O                     | O        | O         | O          | X          |
|                        | 19B01          | Mixed brain sample    |          |           |            |            |
|                        | 19B02          | O                     | O        | X         | X          | X          |
|                        | 19B03          | Mixed brain sample    |          |           |            |            |
|                        | 19B12          | Mixed brain sample    |          |           |            |            |
|                        | 19B14          | Mixed brain sample    |          |           |            |            |
|                        | 19B23          | Mixed brain sample    |          |           |            |            |
|                        | 19B28          | Mixed brain sample    |          |           |            |            |
|                        | 19B29          | Mixed brain sample    |          |           |            |            |
|                        | 19B13          | Mixed brain sample    |          |           |            |            |
|                        | 19B15          | Mixed brain sample    |          |           |            |            |
|                        | 19B22          | Mixed brain sample    |          |           |            |            |
|                        | 19B33          | O                     | O        | O         | O          | O          |
|                        | 19B34          | O                     | O        | O         | O          | O          |
|                        | 19B35          | O                     | O        | O         | O          | O          |
|                        | 19B36          | O                     | O        | O         | O          | O          |
|                        | 19B37          | O                     | O        | O         | X          | X          |

**Table S1.** (Continued).

| Disease<br>diagnostics | Sample<br>name | Brain tissue (n= 42) |          |           |            |            |
|------------------------|----------------|----------------------|----------|-----------|------------|------------|
|                        |                | Forebrain            | Midbrain | Hindbrain | Cerebellum | Brain stem |
| Normal<br>cattle       | 19R149         | O                    | O        | O         | O          | O          |
|                        | 19R150         | O                    | O        | O         | O          | O          |
|                        | 19R1601        | O                    | O        | O         | O          | O          |
|                        | 19R1603        | O                    | O        | O         | O          | O          |
|                        | 19R1604        | O                    | O        | O         | O          | O          |
|                        | 19R1651        | O                    | O        | O         | O          | O          |
|                        | 19R1652        | O                    | O        | O         | O          | O          |
|                        | 19R1653        | X                    | O        | X         | O          | O          |
|                        | 19R1656        | O                    | O        | O         | O          | X          |
