# Supplementary material for: Bacterial Profiles of Brain in Downer Cattle with Unknown Etiology
Source: MDPI journal article supplement (doi:10.3390/microorganisms11010098), 2022-12-30
Supplement: s1 [file s1]

**Table S5:****The list of genera that are different in the bacterial network from downer and normal cattle.**

| Type          | Genus                                                     | Degree | Average of $\rho$ value | Average of $p$ -value | Average of $q$ -value |
|---------------|-----------------------------------------------------------|--------|-------------------------|-----------------------|-----------------------|
| Downer cattle | UCG-009                                                   | 7      | 0.72                    | 6.8E-12               | 1.5E-11               |
|               | JG30-KF-CM45                                              | 7      | 0.55                    | 4.1E-09               | 5.7E-09               |
|               | <i>Altererythrobacter</i>                                 | 6      | 0.56                    | 4.6E-09               | 6.3E-09               |
|               | <i>Moryella</i>                                           | 6      | 0.54                    | 2.5E-08               | 2.8E-08               |
|               | <i>Glutamicibacter</i>                                    | 6      | 0.51                    | 8.0E-08               | 8.5E-08               |
|               | <i>Paraprevotella</i>                                     | 5      | 0.65                    | 1.1E-10               | 2.1E-10               |
|               | <i>Williamsia</i>                                         | 5      | 0.61                    | 3.3E-08               | 3.4E-08               |
|               | <i>Paeniglutamicibacter</i>                               | 5      | 0.60                    | 6.9E-09               | 8.2E-09               |
|               | [Eubacterium]_coprostanoligenes_group                     | 5      | 0.59                    | 5.0E-08               | 5.1E-08               |
|               | <i>Shuttleworthia</i>                                     | 5      | 0.53                    | 7.2E-08               | 7.4E-08               |
| Normal cattle | <i>Pusillimonas</i>                                       | 21     | 0.52                    | 5.0E-08               | 5.5E-08               |
|               | <i>Sphingopyxis</i>                                       | 19     | 0.60                    | 1.3E-09               | 1.7E-09               |
|               | <i>Iamia</i>                                              | 16     | 0.57                    | 1.3E-08               | 1.7E-08               |
|               | <i>Candidatus_Obscuribacter</i>                           | 6      | 0.63                    | 1.3E-08               | 1.5E-08               |
|               | U29-B03                                                   | 6      | 0.53                    | 2.6E-08               | 3.1E-08               |
|               | <i>Allorhizobium-Neorhizobium-Pararhizobium-Rhizobium</i> | 5      | 0.80                    | 1.4E-08               | 1.5E-08               |
|               | Christensenellaceae_R-7_group                             | 5      | 0.55                    | 2.0E-08               | 2.4E-08               |
|               | [Eubacterium]_hallii_group                                | 5      | 0.51                    | 8.0E-08               | 8.4E-08               |
