# Supplementary material for: Bacterial Profiles of Brain in Downer Cattle with Unknown Etiology
Source: MDPI journal article supplement (doi:10.3390/microorganisms11010098), 2022-12-30
Supplement: s1 [file s1]

**Table S7:**  
**Differences of COG pathway from downer and normal cattle.**

| Category                                 | Pathway                          | Downer cattle               |                        | Normal cattle               |                        | No. of functional genes | p-values (corrected) |
|------------------------------------------|----------------------------------|-----------------------------|------------------------|-----------------------------|------------------------|-------------------------|----------------------|
|                                          |                                  | Mean relative frequency (%) | Standard deviation (%) | Mean relative frequency (%) | Standard deviation (%) |                         |                      |
| F. Nucleotide transport and metabolism   | Purine biosynthesis              | 0.04                        | 0.01                   | 0.05                        | 0.01                   | 15                      | 0.00143              |
|                                          | Pyrimidine biosynthesis          | 0.05                        | 0.01                   | 0.06                        | 0.01                   | 8                       | 0.00235              |
|                                          | Pyrimidine salvage               | 0.04                        | 0.02                   | 0.05                        | 0.02                   | 8                       | 0.01213              |
|                                          | Thymidylate biosynthesis         | 0.03                        | 0.01                   | 0.04                        | 0.01                   | 5                       | 0.00816              |
|                                          | Arginine biosynthesis            | 0.05                        | 0.01                   | 0.06                        | 0.01                   | 1                       | 0.04708              |
| G. Carbohydrate transport and metabolism | Glycolysis                       | 0.04                        | 0.01                   | 0.05                        | 0.01                   | 12                      | 0.00510              |
|                                          | Pentose phosphate pathway        | 0.05                        | 0.02                   | 0.07                        | 0.02                   | 4                       | 0.00564              |
|                                          | Gluconeogenesis                  | 0.04                        | 0.02                   | 0.05                        | 0.02                   | 2                       | 0.00819              |
|                                          | Isoprenoid biosynthesis          | 0.02                        | 0.01                   | 0.03                        | 0.02                   | 1                       | 0.00600              |
| H. Coenzyme transport and metabolism     | Heme biosynthesis                | 0.03                        | 0.01                   | 0.04                        | 0.01                   | 10                      | 0.00433              |
|                                          | Folate biosynthesis              | 0.04                        | 0.01                   | 0.05                        | 0.01                   | 7                       | 0.01457              |
|                                          | Menaquinone biosynthesis         | 0.02                        | 0.01                   | 0.03                        | 0.01                   | 5                       | 0.00277              |
|                                          | Pantothenate CoA biosynthesis    | 0.04                        | 0.01                   | 0.05                        | 0.01                   | 5                       | 0.00110              |
|                                          | Thiamine biosynthesis            | 0.05                        | 0.01                   | 0.06                        | 0.02                   | 3                       | 0.00095              |
|                                          | Lipoate biosynthesis             | 0.04                        | 0.01                   | 0.05                        | 0.03                   | 2                       | 0.00255              |
|                                          | Aromatic amino acid biosynthesis | 0.04                        | 0.01                   | 0.06                        | 0.01                   | 1                       | 0.00000              |
|                                          | Cysteine biosynthesis            | 0.04                        | 0.02                   | 0.05                        | 0.03                   | 1                       | 0.02184              |

**Table S7. (Continued)**

| Category                                                        | Pathway                                     | Downer cattle               |                        | Normal cattle               |                        | No. of functional genes | p-values (corrected) |
|-----------------------------------------------------------------|---------------------------------------------|-----------------------------|------------------------|-----------------------------|------------------------|-------------------------|----------------------|
|                                                                 |                                             | Mean relative frequency (%) | Standard deviation (%) | Mean relative frequency (%) | Standard deviation (%) |                         |                      |
| J. Translation, ribosomal structure and biogenesis              | Aminoacyl-tRNA synthetases                  | 0.05                        | 0.01                   | 0.06                        | 0.01                   | 21                      | 0.00324              |
|                                                                 | Translation factors                         | 0.05                        | 0.01                   | 0.06                        | 0.01                   | 10                      | 0.00811              |
|                                                                 | 16S rRNA modification                       | 0.06                        | 0.01                   | 0.07                        | 0.01                   | 7                       | 0.00166              |
| K. Transcription                                                | RNA polymerase                              | 0.05                        | 0.01                   | 0.06                        | 0.01                   | 3                       | 0.00062              |
| I. Lipid transport and metabolism                               | Fatty acid biosynthesis                     | 0.10                        | 0.03                   | 0.07                        | 0.03                   | 10                      | 0.00269              |
|                                                                 | Menaquinone biosynthesis                    | 0.18                        | 0.09                   | 0.13                        | 0.03                   | 1                       | 0.00041              |
|                                                                 | Non-phosphorylated Entner-Doudoroff pathway | 0.07                        | 0.04                   | 0.03                        | 0.03                   | 1                       | 0.00001              |
| Q. Secondary metabolites biosynthesis, transport and catabolism | Biotin biosynthesis                         | 0.04                        | 0.03                   | 0.02                        | 0.02                   | 1                       | 0.00481              |
| R. General function prediction only                             | Non-phosphorylated Entner-Doudoroff pathway | 0.09                        | 0.04                   | 0.08                        | 0.04                   | 3                       | 0.00109              |
|                                                                 | Pyrimidine degradation                      | 0.12                        | 0.07                   | 0.09                        | 0.05                   | 1                       | 0.00412              |
|                                                                 | Pyrimidine salvage                          | 0.07                        | 0.02                   | 0.05                        | 0.02                   | 1                       | 0.00012              |
