# Supplementary material for: Bacterial Profiles of Brain in Downer Cattle with Unknown Etiology
Source: MDPI journal article supplement (doi:10.3390/microorganisms11010098), 2022-12-30
Supplement: s1 [file s1]

**Table S3:**  
**The comparison of isolated bacteria and microbiota.**

| Symptom                  | Sample | Tissue                                                            | The isolated bacterium                                                                                                                 | Microbiota<br>(Genus level)                                                                       |
|--------------------------|--------|-------------------------------------------------------------------|----------------------------------------------------------------------------------------------------------------------------------------|---------------------------------------------------------------------------------------------------|
| <b>Downer<br/>cattle</b> | 19B12  | Cerebellum                                                        | <i>Carnobacterium divergens</i>                                                                                                        | <i>Carnobacterium</i><br>(6.5%)                                                                   |
|                          | 19B15  | Cerebellum                                                        | <i>Carnobacterium divergens</i>                                                                                                        | <i>Carnobacterium</i><br>(59.4%)                                                                  |
|                          | 19B28  | Cerebellum                                                        | <i>Carnobacterium divergens</i>                                                                                                        | <i>Carnobacterium</i><br>(2.35%)                                                                  |
|                          | 19B35  | Forebrain,<br>Midbrain,<br>Hindbrain,<br>Cerebellum,<br>Brainstem | <i>Trueperella pyogenes</i>                                                                                                            | <i>Trueperell</i><br>(0.29%)                                                                      |
|                          | 19B39  | Forebrain,<br>Midbrain                                            | <i>Carnobacterium maltaromaticum</i>                                                                                                   | <i>Carnobacterium</i><br>(1.9%)                                                                   |
|                          | 19B41  | Forebrain,<br>Midbrain,<br>Hindbrain,<br>Cerebellum               | <i>Carnobacterium divergens</i><br><i>Carnobacterium maltaromaticum</i><br><i>Enterococcus faecalis</i>                                | <i>Carnobacterium</i><br>(5.64%)<br><i>Enterococcus</i><br>(7%)                                   |
|                          | 19B42  | Forebrain,<br>Midbrain                                            | <i>Carnobacterium maltaromaticum</i><br><i>Enterococcus faecalis</i><br><i>Carnobacterium divergens</i><br><i>Lactococcus garvieae</i> | <i>Carnobacterium</i><br>(3.9%)<br><i>Enterococcus</i><br>(3.0%)<br><i>Lactococcus</i><br>(0.01%) |
