# Supplementary material for: Bacterial Profiles of Brain in Downer Cattle with Unknown Etiology
Source: MDPI journal article supplement (doi:10.3390/microorganisms11010098), 2022-12-30
Supplement: s1 [file s1]

**Table S4:****The list of genera that are shared in the bacterial network from downer and normal cattle.**

| Genus                                             | Degree | Downer cattle    |                 |                 | Normal cattle    |                 |                 |
|---------------------------------------------------|--------|------------------|-----------------|-----------------|------------------|-----------------|-----------------|
|                                                   |        | <i>rho</i> value | <i>p</i> -value | <i>q</i> -value | <i>rho</i> value | <i>p</i> -value | <i>q</i> -value |
| <i>Polaromonas</i>                                | 21     | 0.75             | 1.9E-10         | 2.8E-10         | 0.64             | 3.5E-09         | 4.3E-09         |
| <i>Pseudoxanthomonas</i>                          | 20     | 0.57             | 8.6E-10         | 1.4E-09         | 0.52             | 5.3E-08         | 5.9E-08         |
| <i>Luteimonas</i>                                 | 20     | 0.53             | 2.6E-08         | 2.9E-08         | 0.59             | 1.6E-10         | 3.1E-10         |
| Christensenellaceae_R-7_group                     | 11     | 0.59             | 1.0E-08         | 1.1E-08         | 0.58             | 1.5E-08         | 1.7E-08         |
| <i>Paenalcaligenes</i>                            | 10     | 0.72             | 6.9E-12         | 1.5E-11         | 0.73             | 6.2E-13         | 1.8E-12         |
| <i>Fermentimonas</i>                              | 9      | 0.69             | 8.4E-12         | 1.8E-11         | 0.68             | 2.1E-09         | 2.7E-09         |
| <i>Paraprevotella</i>                             | 8      | 0.79             | 6.2E-17         | 2.4E-16         | 0.71             | 6.9E-14         | 2.3E-13         |
| NK4A214_group                                     | 8      | 0.63             | 1.8E-10         | 3.1E-10         | 0.59             | 9.0E-09         | 1.1E-08         |
| <i>Gemmobacter</i>                                | 8      | 0.65             | 1.7E-10         | 2.6E-10         | 0.69             | 1.3E-11         | 2.7E-11         |
| <i>Burkholderia-Caballeronia-Paraburkholderia</i> | 8      | 0.60             | 2.2E-10         | 4.0E-10         | 0.55             | 3.6E-09         | 5.4E-09         |
| <i>Vicinamibacteraceae</i>                        | 6      | 0.62             | 1.4E-11         | 3.4E-11         | 0.56             | 2.1E-09         | 3.3E-09         |
| p-251-o5                                          | 6      | 0.62             | 7.3E-10         | 1.1E-09         | 0.65             | 2.7E-10         | 4.7E-10         |
| F082                                              | 6      | 0.60             | 3.3E-09         | 4.4E-09         | 0.60             | 2.0E-08         | 2.1E-08         |
| <i>Ruminococcus</i>                               | 6      | 0.61             | 4.7E-09         | 5.5E-09         | 0.60             | 1.1E-08         | 1.2E-08         |
| <i>Lysobacter</i>                                 | 6      | 0.62             | 7.5E-09         | 8.5E-09         | 0.62             | 2.5E-08         | 2.7E-08         |
| UCG-011                                           | 5      | 0.67             | 9.1E-11         | 1.6E-10         | 0.68             | 5.0E-10         | 8.0E-10         |
| <i>Fibrobacter</i>                                | 5      | 0.63             | 3.0E-09         | 3.8E-09         | 0.65             | 1.4E-09         | 2.0E-09         |
| <i>Anaerovibrio</i>                               | 5      | 0.70             | 1.5E-11         | 3.2E-11         | 0.61             | 3.0E-11         | 6.7E-11         |
| <i>Acetobacterium</i>                             | 5      | 0.77             | 5.0E-11         | 9.1E-11         | 0.75             | 8.1E-10         | 1.2E-09         |
