# Supplementary material for: Bacterial Profiles of Brain in Downer Cattle with Unknown Etiology
Source: Microorganisms. 2022 Dec 30;11(1):98. doi: 10.3390/microorganisms11010098 (PMC9862898; doi:10.3390/microorganisms11010098)
Supplement: Supplementary file 1 [file microorganisms-11-00098-s001.zip]

Archive with 10 entries (10 files):
- supplemental Figure S1.jpg
- supplemental Figure S2.jpg
- supplemental Figure S3.jpg
- Supplemental Table S1.pdf
- Supplemental Table S2.pdf
- Supplemental Table S3.pdf
- Supplemental Table S4.pdf
- Supplemental Table S5.pdf
- Supplemental Table S6.pdf
- Supplemental Table S7.pdf
